# Supplementary material
Source: PubMed Central journal article supplement (PMC7184766)

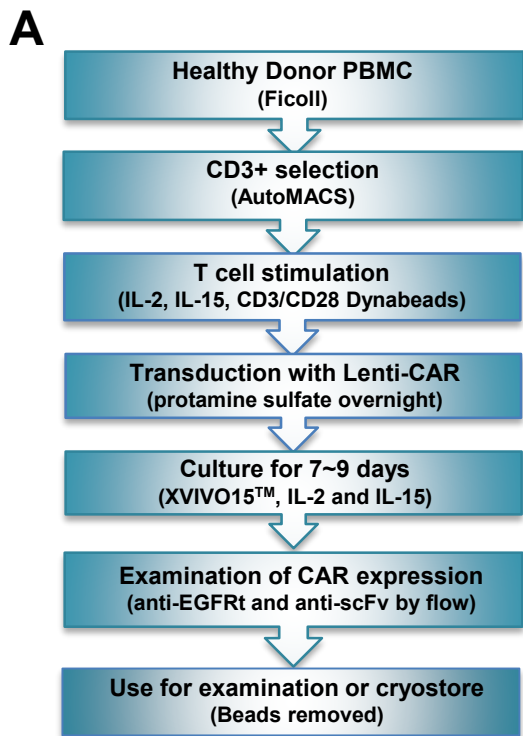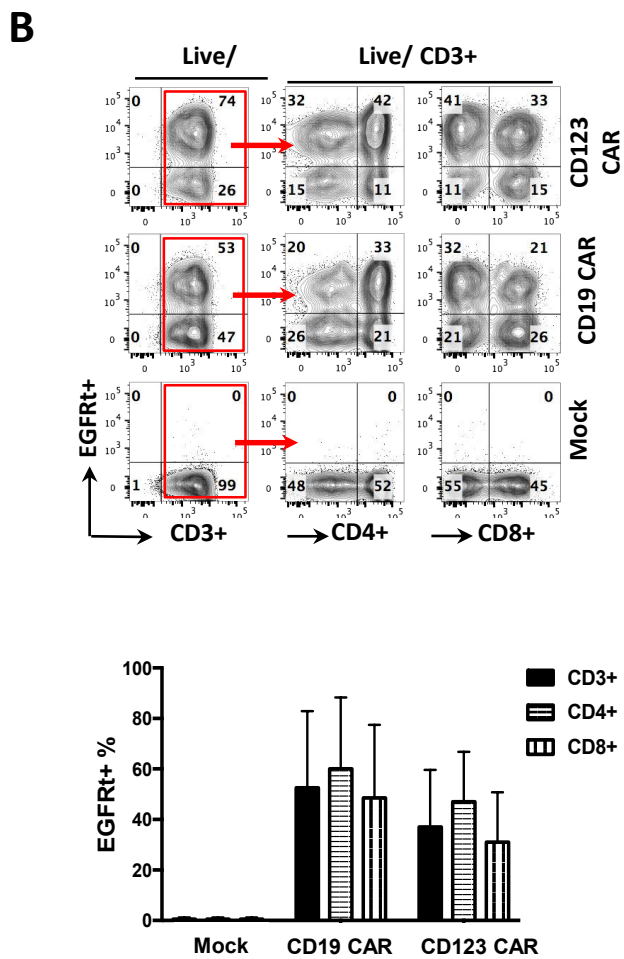

Supplemental Figure 1

Pt #6

CD3-/CD34+/CD38-

CD34+/ CD38-/ CD123+

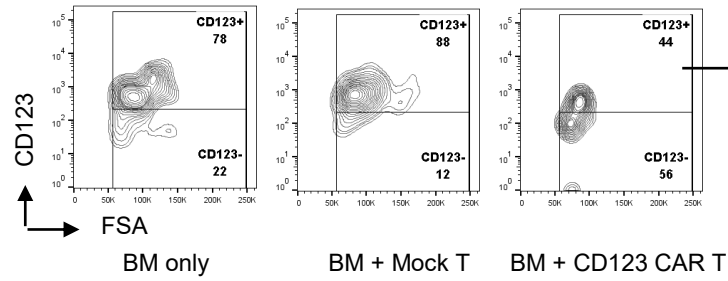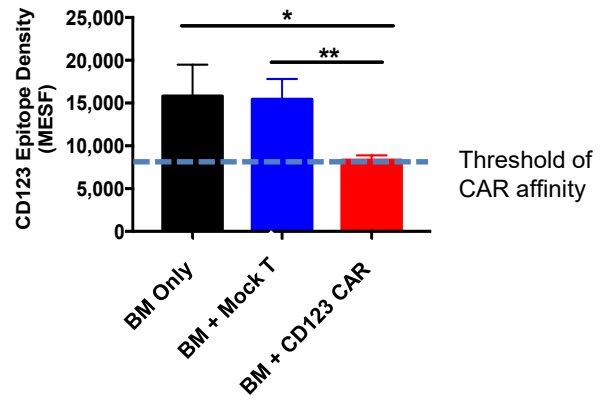

Supplemental Figure 2

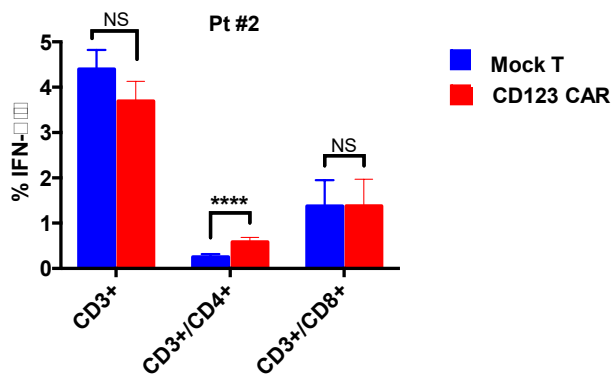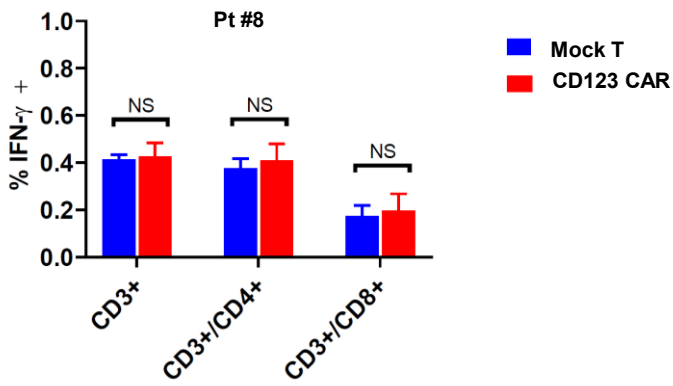

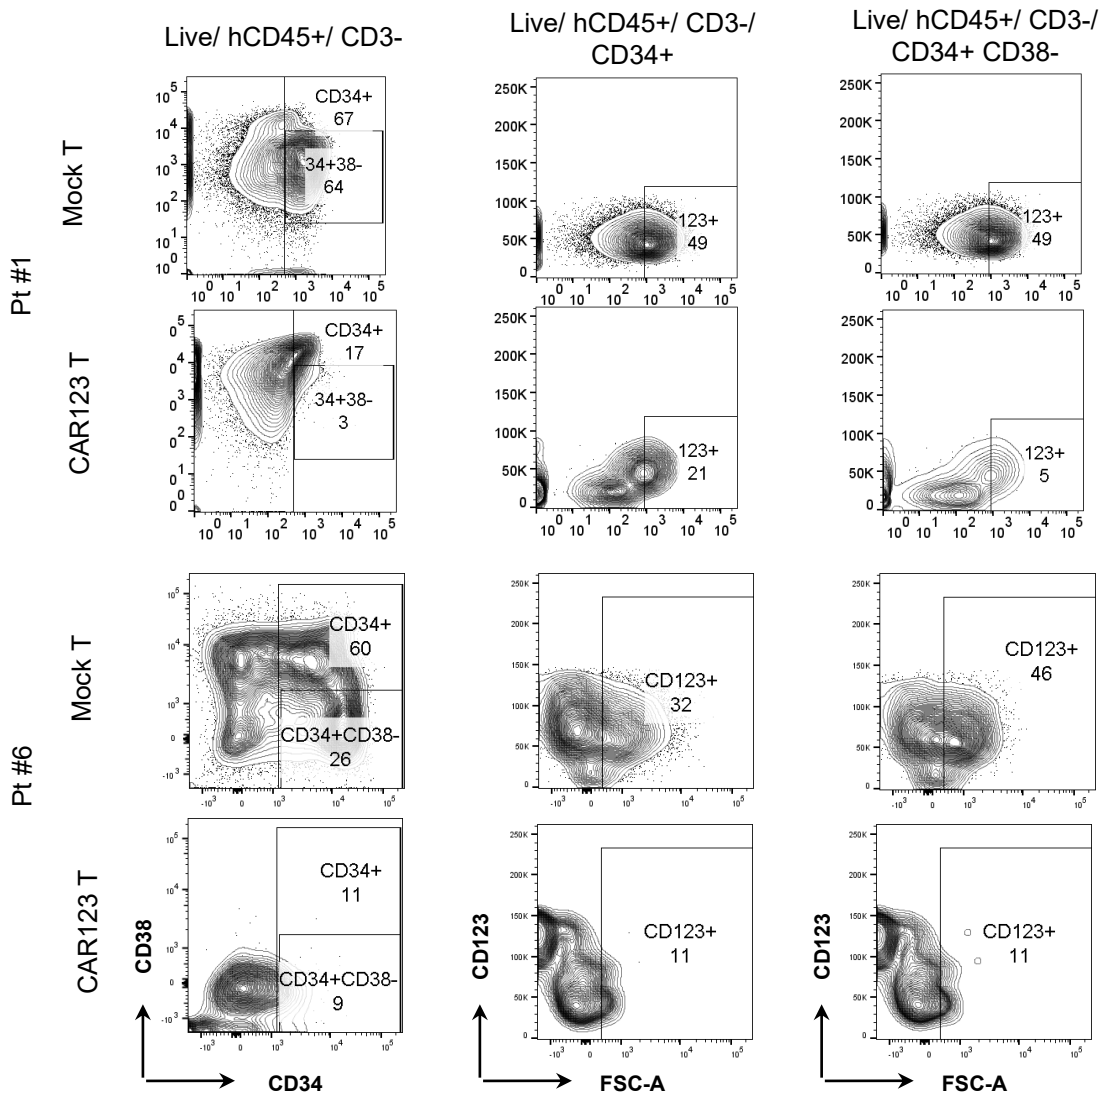

Supplemental Figure 4

Supplement: NIHMS1565479-supplement-1.pdf [file NIHMS1565479-supplement-1.pdf]
